# Supplementary material
Source: PubMed Central journal article supplement (PMC7007003)
Supplement: am9b12472_si_001.pdf [file am9b12472_si_001.pdf]

## Supporting Information for:

# Block Copolymer Nanoparticles Prepared via Polymerization-Induced Self-Assembly Provide Excellent Boundary Lubrication Performance for Next-Generation Ultralow Viscosity Automotive Engine Oils

*Matthew J. Derry,<sup>\*†</sup> Timothy Smith,<sup>‡</sup> Paul S. O'Hora,<sup>‡</sup> and Steven P. Armes<sup>\*†</sup>*

<sup>†</sup> Dainton Building, Department of Chemistry, University of Sheffield, Brook Hill, Sheffield, S3 7HF, South Yorkshire, UK.

<sup>‡</sup> Lubrizol Ltd., The Knowle, Nether Lane, Hazelwood, Derbyshire, DE56 4AN, UK.

\*E-mail: m.derry@sheffield.ac.uk; s.p.arnes@sheffield.ac.uk

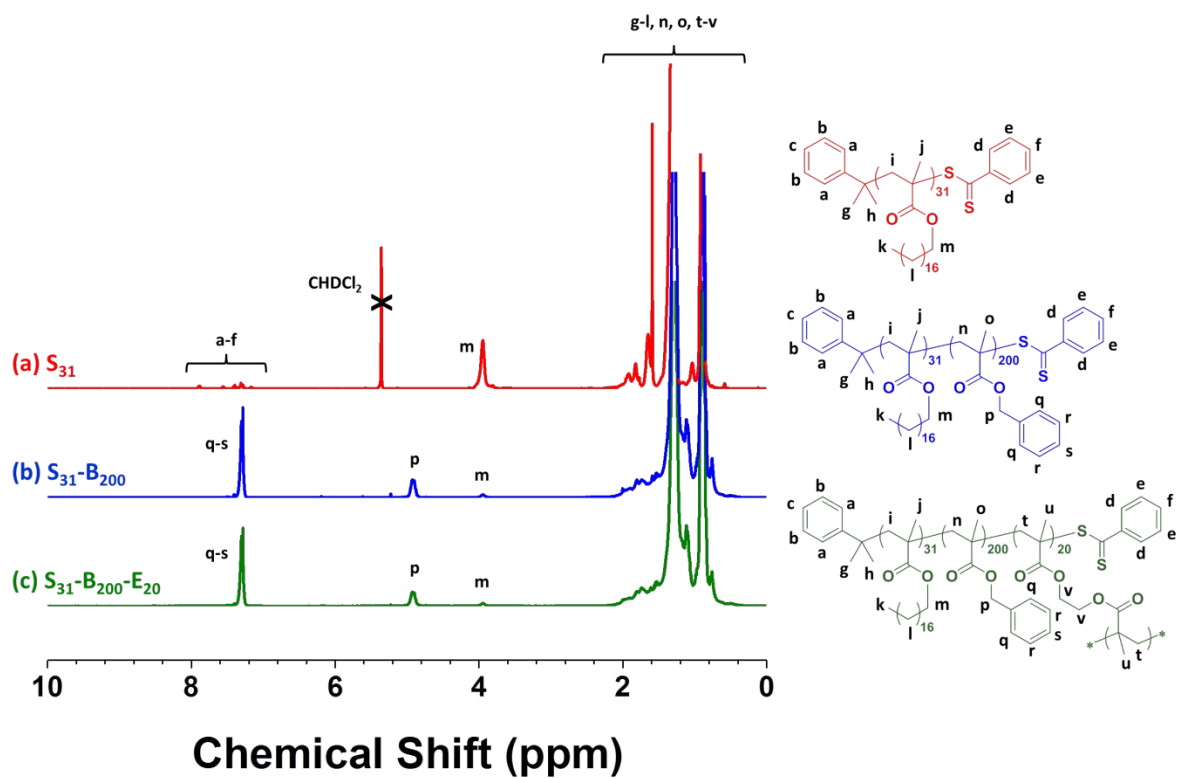

**Figure S1.** Assigned  $^1\text{H}$  NMR spectra for (a) poly(stearyl methacrylate) ( $S_{31}$ ) macro-CTA in  $\text{CD}_2\text{Cl}_2$ , (b) poly(stearyl methacrylate)-poly(benzyl methacrylate) ( $S_{31}\text{-B}_{200}$ ) diblock copolymer in  $\text{CDCl}_3$  and (c) poly(stearyl methacrylate)-poly(benzyl methacrylate)-poly(ethylene glycol dimethacrylate) ( $S_{31}\text{-B}_{200}\text{-E}_{20}$ ) triblock copolymer in  $\text{CDCl}_3$ .

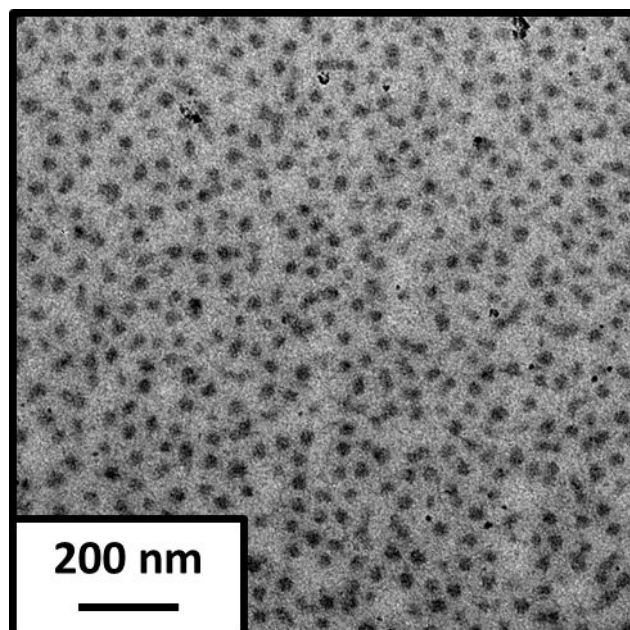

**Figure S2.** Transmission electron micrograph of cross-linked poly(stearyl methacrylate)-poly(benzyl methacrylate)-poly(ethylene glycol dimethacrylate) ( $S_{31}$ - $B_{200}$ - $E_{20}$ ) spheres dried from a 0.10% w/w dispersion in THF.

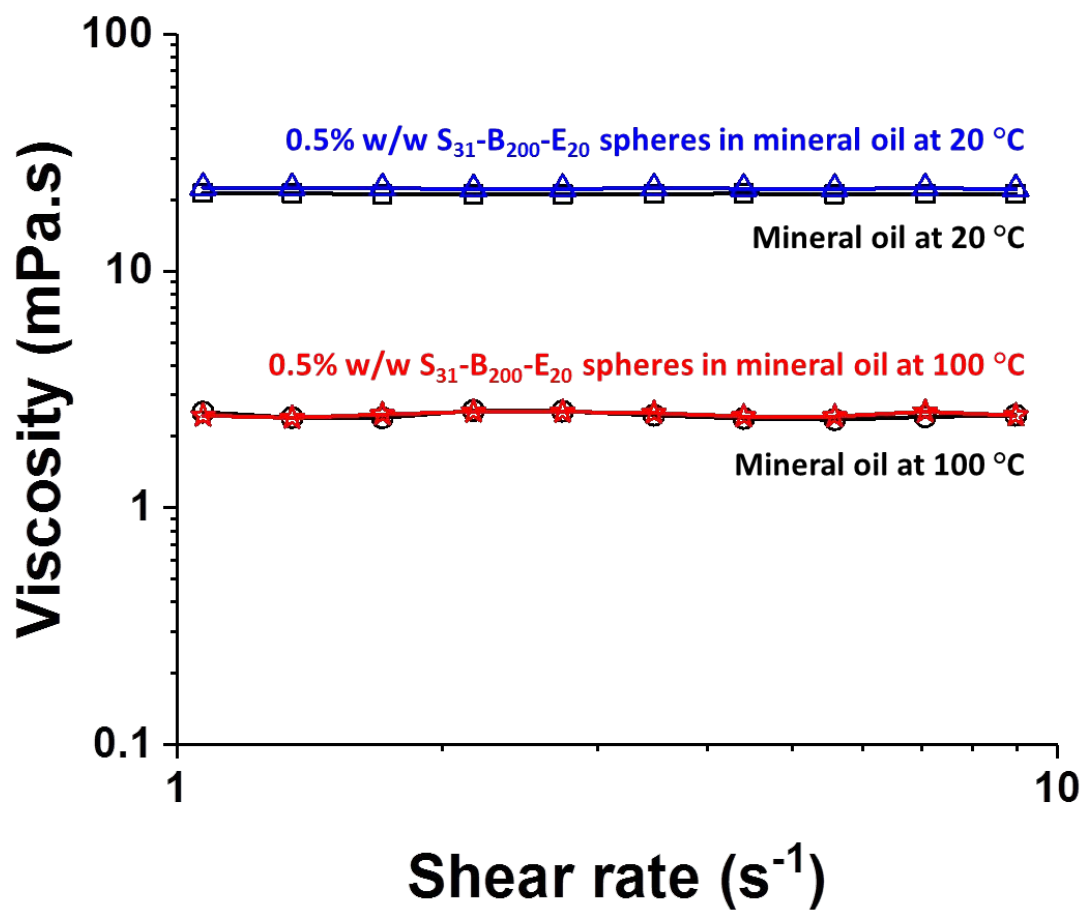

**Figure S3.** Shear rate vs. viscosity for mineral oil alone at 20 °C (open black squares) and 100 °C (open black circles), and a 0.5% w/w dispersion of S<sub>31</sub>-B<sub>200</sub>-E<sub>20</sub> spheres in mineral oil at 20 °C (open blue triangles) and 100 °C (open red stars).

## SAXS Models

In general, the X-ray intensity scattered by a dispersion of particles [usually represented by the scattering cross section per unit sample volume,  $\frac{d\Sigma}{d\Omega}(q)$ ] can be expressed as:

$$\frac{d\Sigma}{d\Omega}(q) = NS(q) \prod_0^{\infty} \dots \prod_0^{\infty} F(q, r_1, \dots, r_k)^2 \Psi(r_1, \dots, r_k) dr_1 \dots dr_k \quad S1$$

where  $F(q, r_1, \dots, r_k)$  is their form factor,  $r_1, \dots, r_k$  is a set of  $k$  parameters describing the particle structural morphology,  $\Psi(r_1, \dots, r_k)$  is the distribution function,  $S(q)$  is the structure factor (for 1.0% w/w dispersions it can be assumed that there are no inter-particle interactions and thus  $S(q) = 1$ ) and  $N$  is the particle number density per unit sample volume expressed as:

$$N = \frac{\varphi}{\int_0^{\infty} \dots \int_0^{\infty} V(r_1, \dots, r_k) \Psi(r_1, \dots, r_k) dr_1 \dots dr_k} \quad S2$$

where  $V(r_1, \dots, r_k)$  is volume of the particle and  $\varphi$  is their volume fraction in the dispersion.

The spherical micelle form factor for Equation *S1* can be expressed as:<sup>1</sup>

$$F_{s\_mic}(q) = N_s^2 \beta_s^2 A_s^2(q, R_s) + N_s \beta_c^2 F_c(q, R_g) + N_s (N_s - 1) \beta_c^2 A_c^2(q) + 2N_s^2 \beta_s \beta_c A_s(q) A_c(q) \quad S3$$

where  $R_s$  is the radius of the spherical micelle core,  $R_g$  is the radius of gyration of the PSMA coronal block. The core block and the corona block X-ray scattering length contrast is given by  $\beta_s = V_s(\xi_s - \xi_{sol})$  and  $\beta_c = V_c(\xi_c - \xi_{sol})$ , respectively. Here  $\xi_s$ ,  $\xi_c$  and  $\xi_{sol}$  are the X-ray scattering length densities of the core block ( $\xi_{PBzMA_{200}} = 10.38 \times 10^{10} \text{ cm}^{-2}$  or  $\xi_{PBzMA_{200} - PEGDMA_{20}} = 10.36 \times 10^{10} \text{ cm}^{-2}$ ), the corona block ( $\xi_{PSMA_{31}} = 9.26 \times 10^{10} \text{ cm}^{-2}$ ) and the mineral oil solvent ( $\xi_{sol} = 7.63 \times 10^{10} \text{ cm}^{-2}$ ), respectively.  $V_s$  and  $V_c$  are volumes of the core block ( $V_{PBzMA_{200}}$  or  $V_{PBzMA_{200} - PEGDMA_{20}}$ ) and the corona block ( $V_{PSMA_{31}}$ ), respectively.

The volumes were obtained from  $V = \frac{M_{n,pol}}{N_A \rho}$  using the densities of PBzMA ( $\rho_{PBzMA} = 1.15 \text{ g cm}^{-3}$ ),<sup>2</sup> PEGDMA ( $\rho_{PEGDMA} = 1.10 \text{ g cm}^{-3}$ ) and the solid-state homopolymer density of PSMA

determined by helium pycnometry ( $\rho_{\text{PSMA}} = 0.97 \text{ g cm}^{-3}$ ), where  $M_{n,\text{pol}}$  corresponds to the number-average molecular weight of the block determined by  $^1\text{H}$  NMR spectroscopy. The scattering amplitude of the micelle core is expressed via sphere form factor amplitude:

$$A_c(q, R_s) = \Phi(qR_s) \exp\left(-\frac{q^2\sigma^2}{2}\right) \quad S4$$

where  $\Phi(qR_s) = \frac{3[\sin(qR_s) - qR_s\cos(qR_s)]}{(qR_s)^3}$ . A sigmoidal interface between the two blocks was assumed for the spherical micelle form factor (Equation S4). This is described by the exponent term with a width  $\sigma$  accounting for a decaying scattering length density at the membrane surface. This  $\sigma$  value was fixed at 0.22 nm during fitting.

The scattering amplitude of the spherical micelle corona is:

$$A_c(q) = \frac{\int_{R_s}^{R_s+2s} \mu_c(r) \frac{\sin(qr)}{qr} r^2 dr}{\int_{R_s}^{R_s+2s} \mu_c(r) r^2 dr} \exp\left(-\frac{q^2\sigma^2}{2}\right) \quad S5$$

The radial profile,  $\mu_c(r)$ , can be expressed by a linear combination of two cubic b splines, with two fitting parameters  $s$  and  $a$  corresponding to the width of the electron density corona profile and the function weight coefficient, respectively. This information can be found elsewhere,<sup>3-4</sup> as can the approximate integrated form of Equation S5. The self-correlation term for the corona block is given by the Debye function:

$$F_c(q, R_g) = \frac{2[\exp(-q^2R_g^2) - 1 + q^2R_g^2]}{q^4R_g^4} \quad S6$$

where  $R_g$  is the radius of gyration of the PSMA coronal block. The aggregation number of the spherical micelle is:

$$N_s = (1 - x_{\text{sol}}) \frac{\frac{4}{3}\pi R_s^3}{V_s} \quad S7$$

where  $x_{\text{sol}}$  is the volume fraction of solvent in the PBzMA or PBzMA-PEGDMA micelle core. A polydispersity of the micelle core radius ( $R_s$ ) was incorporated in the structural model (Equation S1) assuming a Gaussian distribution:

$$\Psi(r_1) = \frac{1}{\sqrt{2\pi\sigma_{R_s}^2}} \exp\left(-\frac{(r_1 - R_s)^2}{2\sigma_{R_s}^2}\right) \quad S8$$

where  $\sigma_{R_s}$  is the standard deviation for  $R_s$ . In accordance with Equation S2 the number density per unit sample volume for the micelle model is expressed as:

$$N = \frac{\varphi}{\int_0^\infty V(r_1)\Psi(r_1)dr_1} \quad S9$$

where  $\varphi$  is the volume fraction of copolymer in a sample and  $V(r_1)$  is the total *volume* of copolymer in a spherical micelle [ $V(r_1) = (V_s + V_c)N_s(r_1)$ ].

**Table S1.** Summary of parameters after fitting SAXS patterns obtained for 1.0% w/w dispersions in mineral oil using a spherical micelle model.<sup>1</sup>  $\varphi$  is the volume fraction of copolymers obtained from the fitting,  $D_s$  is the spherical micelle core diameter (equal to  $2R_s$ , where  $R_s$  is the spherical micelle core radius),  $R_g$  is the radius of gyration of the PSMA stabilizer block,  $x_{\text{sol}}$  is the volume fraction of solvent within the core domain and  $N_s$  is the mean aggregation number.

| Sample                                                      | $\varphi$ | $D_s (= 2R_s) / \text{nm}$ | $R_g / \text{nm}$ | $x_{\text{sol}}$ | $N_s$ |
|-------------------------------------------------------------|-----------|----------------------------|-------------------|------------------|-------|
| S <sub>31</sub> -B <sub>200</sub> , 20 °C                   | 0.00594   | 27.6 ± 2.1                 | 1.4               | 0                | 218   |
| S <sub>31</sub> -B <sub>200</sub> -E <sub>20</sub> , 20 °C  | 0.00742   | 29.4 ± 2.4                 | 1.4               | 0                | 234   |
| S <sub>31</sub> -B <sub>200</sub> -E <sub>20</sub> , 100 °C | 0.00630   | 29.5 ± 2.3                 | 1.4               | 0                | 237   |

## References

1. Pedersen, J. S. Form factors of block copolymer micelles with spherical, ellipsoidal and cylindrical cores. *Journal of Applied Crystallography* **2000**, *33*, 637-640.
2. Fielding, L. A.; Lane, J. A.; Derry, M. J.; Mykhaylyk, O. O.; Armes, S. P. Thermo-responsive diblock copolymer worm gels in non-polar solvents. *Journal of the American Chemical Society* **2014**, *136*, 5790-5798.

3. Pedersen, J. S.; Gerstenberg, M. C. The structure of P85 Pluronic block copolymer micelles determined by small-angle neutron scattering. *Colloids and Surfaces a-Physicochemical and Engineering Aspects* **2003**, *213*, 175-187.
4. Pedersen, J. S.; Svaneborg, C.; Almdal, K.; Hamley, I. W.; Young, R. N. A small-angle neutron and X-ray contrast variation scattering study of the structure of block copolymer micelles: Corona shape and excluded volume interactions. *Macromolecules* **2003**, *36*, 416-433.
